# Supplementary material for: Ambivalenter Sexismus gegenüber jugendlichen Mädchen
Source: Atypon-hosted journal article supplement (doi:10.1026/0012-1924/a000306), 2022-11-01
Supplement: 0012-1924_a000306_esm1.pdf [file 0012-1924_a000306_esm1.pdf]

Elektronisches Supplement 1. Items des ASI-Mäd getrennt nach Subskalen.

| Item                               |                                                                                                                                          |
|------------------------------------|------------------------------------------------------------------------------------------------------------------------------------------|
| BENEVOLENTER SEXISMUS <sup>a</sup> |                                                                                                                                          |
| Paternalismus                      |                                                                                                                                          |
| bp3                                | Wenn Jungen mit Mädchen unterwegs sind, sollten die Jungen alles bezahlen.                                                               |
| bp4                                | In gefährlichen Situationen sollten Jungen dafür sorgen, dass erst die Mädchen gerettet werden, bevor sich jemand um die Jungen kümmert. |
| bp5                                | Wenn die Freundin friert, sollte der Junge ihr seinen Pullover geben, auch wenn ihm dann selbst kalt ist.                                |
| bp6                                | Wenn im Bus nur noch ein Sitzplatz frei ist, sollte der Junge dem Mädchen diesen Platz anbieten und selbst stehen bleiben.               |
| bp9                                | Wenn ein Mädchen mit jemandem ein Problem hat, kann es ruhig seinen Freund oder Bruder losschicken, um das Problem zu lösen.             |
| bp10 (-)                           | Wenn Jungen und Mädchen zusammen ausgehen, sollten sie sich die Rechnung teilen.                                                         |
| Geschlechterdifferenzierung        |                                                                                                                                          |
| bg2                                | Wenn man jemanden zum Reden braucht, sollte man sich besser an ein Mädchen als an einen Jungen wenden.                                   |
| bg3                                | Mädchen nehmen besser wahr, was mit anderen los ist.                                                                                     |
| bg4                                | Mädchen sind hilfsbereiter als Jungen.                                                                                                   |
| bg7                                | Mädchen sorgen sich mehr als Jungen darum, dass es anderen gut geht.                                                                     |
| Heterosexualität                   |                                                                                                                                          |
| bh1                                | Ohne eine feste Beziehung zu einem Partner kann man auf Dauer kein glückliches Leben führen.                                             |
| bh3                                | Was wirklich zählt im Leben ist eine glückliche Liebesbeziehung.                                                                         |
| bh4                                | Für jeden ist es am Ende wichtig, einen Partner zu haben, den man liebt.                                                                 |
| HOSTILER SEXISMUS <sup>a</sup>     |                                                                                                                                          |
| Paternalismus                      |                                                                                                                                          |
| hp1                                | Für manche Berufe sind Mädchen einfach nicht geeignet – sie sollten sich besser nicht bei der Feuerwehr oder bei der Polizei bewerben.   |
| hp2                                | Mädchen geben im Vergleich zu Jungen zu schnell auf.                                                                                     |
| hp3                                | Von Handwerkszeug sollten Mädchen besser die Finger lassen, sie richten damit nur Schaden an.                                            |
| hp4                                | Harte Sportarten wie Fußball, Rugby und Boxen sollte man Jungen überlassen.                                                              |
| hp6                                | Jungen können eine Gruppe besser führen als Mädchen.                                                                                     |
| Heterosexualität                   |                                                                                                                                          |
| hh3                                | Mädchen nutzen Jungen oft aus: Erst lassen sie sich von ihnen einladen, nur um sie am Ende doch abblitzen zu lassen.                     |
| hh7                                | Ist ein Junge erstmal fest mit einem Mädchen zusammen, versucht das Mädchen, ihn zu kontrollieren.                                       |
| Geschlechterdifferenzierung        |                                                                                                                                          |
| hg1                                | Bei Mädchen weiß man nie so genau, woran man ist – ständig ändern sie ihre Meinung.                                                      |
| hg5                                | Jungen können mit schwierigen Situationen viel gelassener umgehen.                                                                       |
| hg6                                | Mädchen brechen schnell in Tränen aus, man muss aufpassen, was man zu ihnen sagt.                                                        |
| hg7                                | Mädchen halten einfach nicht so viel aus wie Jungen.                                                                                     |
| hg9                                | Mädchen sind oft grundlos beleidigt.                                                                                                     |

*Anmerkungen:* bp = benevolenter Paternalismus, bg = benevolente Geschlechterdifferenzierung, bh = benevolente Heterosexualität, hp = hostiler Paternalismus, hg = hostile Geschlechterdifferenzierung, hh = hostile Heterosexualität. <sup>a</sup> Faktorenanalysen bestätigen die Struktur aus einem allgemeinen HS-Mäd-Faktor sowie aus einem BS-Mäd-Faktor zweiter Ordnung und drei BS-Mäd-spezifischen Faktoren erster Ordnung (Rau, 2013).
