# Supplementary material for: Ambivalenter Sexismus gegenüber jugendlichen Mädchen
Source: Atypon-hosted journal article supplement (doi:10.1026/0012-1924/a000306), 2022-11-01
Supplement: 0012-1924_a000306_esm2.pdf [file 0012-1924_a000306_esm2.pdf]

*Elektronisches Supplement 2.* Korrelationen zwischen den ASI-Mäd-Skalen und anderen Skalen bei Studierenden der Sozialwissenschaften (Studie 2) und einer Polizeihochschule (Studie 3).

|        | HS-Mäd |    | BS-Mäd |        | HS     |        | BS     |        | RWA    |        | SDO    |        |
|--------|--------|----|--------|--------|--------|--------|--------|--------|--------|--------|--------|--------|
|        | S2     | S3 | S2     | S3     | S2     | S3     | S2     | S3     | S2     | S3     | S2     | S3     |
| HS-Mäd | -      | -  | .62*** | .43*** | .67*** | .61*** | .51*** | .17*   | .54*** | .39*** | .32*** | .35*** |
| BS-Mäd | -      | -  | -      | -      | .51*** | .22**  | .73*** | .64*** | .42*** | .24**  | .23*** | -.04   |
| HS     | -      | -  | -      | -      | -      | -      | .59*** | .29*** | .56*** | .42*** | .36*** | .47*** |
| BS     | -      | -  | -      | -      | -      | -      | -      | -      | .43*** | .35*** | .12*   | .03    |

*Anmerkungen:* S2 = Stichprobe der Studie 2: Studierende der Sozialwissenschaften, S3 = Stichprobe der Studie 3: Studierende an einer Polizei-Hochschule. HS-Mäd = hostiler Sexismus gegenüber Mädchen, BS-Mäd = benevolenter Sexismus gegenüber Mädchen, HS = hostiler Sexismus gegenüber Frauen, BS = benevolenter Sexismus gegenüber Frauen, RWA = right-wing Autoritarismus, SDO = soziale Dominanzorientierung. \*  $p < .05$ , \*\*  $p < .01$  \*\*\*  $p < .001$ .
